# Supplementary material
Source: PubMed Central journal article supplement (PMC10125276)
Supplement: bg2c00023_si_001.pdf [file bg2c00023_si_001.pdf]

**Supporting Information for:**

**Investigation of acid-base catalysis in the halimadienyl diphosphate synthase involved in  
*Mycobacterium tuberculosis* virulence**

Cody Lemke,<sup>1,†</sup> Kristin Roach,<sup>1,†</sup> Teresa Ortega,<sup>2</sup> Dean J. Tantillo,<sup>2</sup> Justin B. Siegel<sup>2,3,4</sup> and Reuben J. Peters<sup>1,\*</sup>

<sup>1</sup>Roy J. Carver Department of Biochemistry, Biophysics & Molecular Biology, Iowa State University, Ames, IA 50011, United States

<sup>2</sup>Department of Chemistry, University of California-Davis, Davis, CA 95616, United States

<sup>3</sup>Department of Biochemistry and Molecular Medicine, University of California-Davis, Davis, CA 95616, United States

<sup>4</sup>Genome Center, University of California-Davis, Davis, CA 95616, United States

<sup>†</sup>These authors made equal contributions.

\*Corresponding author: Email: rjpeters@iastate.edu

**Table of contents**

Figure S1. Depiction of *TerDockin* results for truncated **B** in MtHPS:Y328F/Y479F.

Figure S2. Coupled assay demonstrating stereochemistry of **4**.

Figure S3. Tukey Trimean plot for *TerDockin* total energy distribution with **B**. Intermediate **B** xyz coordinates.

### Docking truncated intermediate **B** in MtHPS:Y328F/Y479F

The results for truncated intermediate **B** found D293 to be 5.1 Å from the proton removed to produce **3** (Figure 3a), potentially suggesting an intervening water molecule could serve as the deprotonating base. However, the energetically favorable poses lacked a reasonable angle for such activity (Figure 3b).

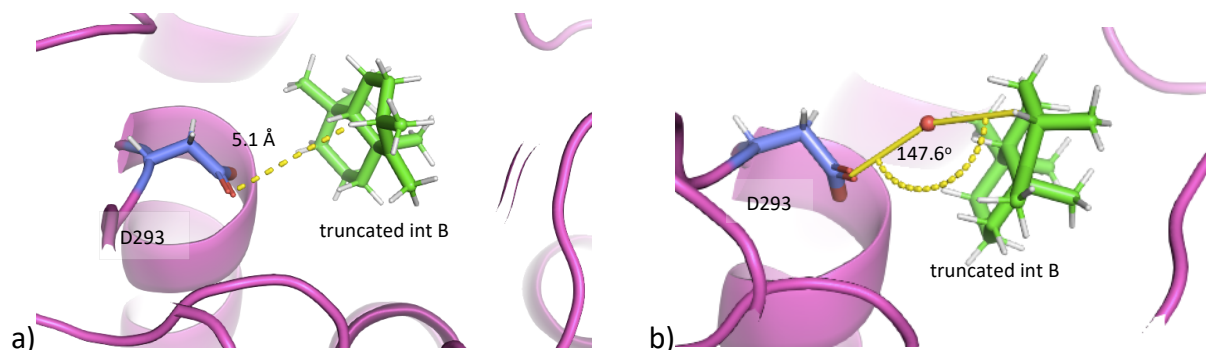

Figure S1. a) D293 carbonyl is 5.1 Å away from the proton removed to produce **3**. b) The resulting angle from acidic proton-oxygen-ASP 276 is chemically unreasonable for deprotonation.

### Stereochemical analysis of **4**

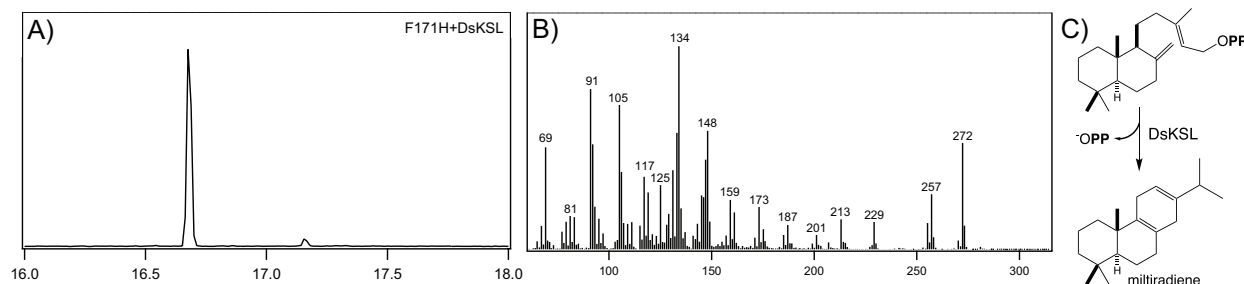

Figure S2. MtHPS:F171H produces normal CPP (**4**). A) Extracted ion ( $m/z = 272$ ) chromatogram from GC-MS analysis of extract from *E. coli* engineered to produce **1** and expressing MtHPS:F171H and DsKSL, which is stereospecific for normal CPP. B) Mass spectra for resulting miltiradiene. C) Reaction catalyzed by DsKSL.

### Tukey Trimean

The total energy distribution included outliers (Figure 1). As a result, the Turkey Trimean was calculated to estimate a better mean from  $-1250.9 \pm 22.9$  to  $-1263.4 \pm 5.8$ .

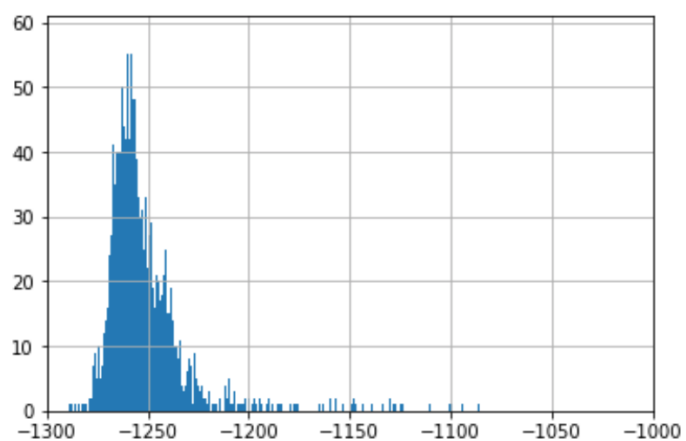

Figure S3. Total energy distribution of intermediate B.

### Intermediate B coordinates

|   |          |          |          |
|---|----------|----------|----------|
| C | -0.04400 | -0.08800 | 1.84700  |
| C | 0.40700  | 0.10800  | -0.66400 |
| C | 2.32700  | 0.38600  | 1.06100  |
| C | 1.44300  | -0.28000 | 2.12400  |
| H | -0.32500 | 0.96600  | 1.95700  |
| H | -0.61100 | -0.62800 | 2.60700  |
| H | 1.66500  | -1.35200 | 2.14900  |
| H | 1.71700  | 0.11900  | 3.10400  |
| C | 0.14200  | -0.54700 | -2.03800 |
| C | -1.92000 | -0.78800 | 0.17400  |
| C | -2.08400 | -1.42400 | -1.22100 |
| C | -1.35300 | -0.67900 | -2.33200 |
| H | 0.61800  | 0.02000  | -2.84300 |
| H | -1.47200 | -1.21000 | -3.28100 |
| H | 0.59300  | -1.54800 | -2.03500 |
| H | -1.80100 | 0.30900  | -2.48800 |
| H | -1.71000 | -2.45700 | -1.17900 |
| C | 0.12300  | 1.67700  | -0.76100 |
| H | -0.26000 | 2.06700  | 0.17900  |
| H | 0.99400  | 2.27500  | -1.05000 |
| H | -0.61900 | 1.81400  | -1.54800 |
| C | -2.71500 | 0.52500  | 0.27100  |
| H | -2.56400 | 1.01900  | 1.23600  |
| H | -2.47300 | 1.24200  | -0.51700 |
| H | -3.78400 | 0.30900  | 0.18600  |

|   |          |          |          |
|---|----------|----------|----------|
| C | -2.51300 | -1.77100 | 1.20100  |
| H | -3.52200 | -2.06100 | 0.89100  |
| H | -1.91600 | -2.68600 | 1.27900  |
| H | -2.60200 | -1.32900 | 2.19700  |
| C | 2.56000  | 1.90100  | 1.36100  |
| H | 3.13900  | 1.96500  | 2.28300  |
| H | 3.11700  | 2.40900  | 0.57000  |
| H | 1.61000  | 2.41600  | 1.51200  |
| C | -0.39700 | -0.62600 | 0.45900  |
| C | 1.83300  | 0.24700  | -0.33200 |
| H | -0.00600 | -1.65600 | 0.42400  |
| H | 3.33000  | -0.06300 | 1.06200  |
| C | 2.85800  | 0.27400  | -1.39100 |
| H | 2.52000  | 0.71500  | -2.32800 |
| H | 3.79900  | 0.71600  | -1.06000 |
| H | -3.15100 | -1.49300 | -1.45900 |
| C | 3.12500  | -1.21300 | -1.69200 |
| H | 2.35700  | -1.63300 | -2.34000 |
| H | 3.18900  | -1.81500 | -0.78600 |
| C | 4.47600  | -1.30200 | -2.42600 |
| C | 5.05100  | -2.50900 | -2.65100 |
| C | 5.17600  | -0.01700 | -2.90500 |
| H | 4.71700  | -3.36800 | -2.10800 |
| C | 6.18500  | -2.64600 | -3.68400 |
| H | 4.53000  | 0.51100  | -3.57600 |
| H | 5.39900  | 0.60300  | -2.06300 |
| H | 6.08300  | -0.27300 | -3.41100 |
| H | 7.05900  | -2.14500 | -3.32400 |
| H | 5.87800  | -2.20700 | -4.61000 |
| F | 6.46300  | -3.95300 | -3.87600 |
